# Supplementary material for: Abscisic acid effects on activity and expression of barley (Hordeum vulgare) plastidial glucose-6-phosphate dehydrogenase
Source: PubMed Central journal article supplement — J Exp Bot. 2011 Apr 4;62(11):4013–23. doi: 10.1093/jxb/err100 (PMC3134356; doi:10.1093/jxb/err100), 2011-04-04

# Abscisic acid effects on activity and expression of plastidial glucose 6 phosphate dehydrogenase isoforms in barley (*Hordeum vulgare*)

Manuela Cardi, Kamel Chibani, Donata Cafasso, Nicolas Rouhier, Jean-Pierre Jacquot, and Sergio Esposito

## SUPPLEMENTARY DATA

### Cytosolic Cy-G6PDH

#### >HvCy (FJ790424)

MAGTDSSASSRQSSFNLSLAKDLELPLEQGCLTIVVLGASGDLAKKKTFFPALYHLFEQGFLQSGEVHIVGYARTNLSDDGLRGRIRA  
YKLGASEEHVSEFLQLIKYVSGSYDSGEGFEKLNKEISDYEMSNNSGSSRRLFYLALPPSVYPSVCKMIRTYCMSPTSRGTWTRVI  
VEKPFGRDLDSAEELSSQLGELFQEDQLYRIDHLYLGGKELVQNLVLRANRFLPLWNRDNVDNIQIVFREDFGTGDRGGYFDQYG  
IIRDI IQNHLLQVFCVAMEKPVSLKPEHIRDEKVKVQLQSVNPIKDEEVVLGQYQGYKDDPTVPDDSNTPPTFASIVLRVHNERWEG  
VPFILKAGKALNSRKAERIRVQFKDVPDGI FKCCKQGRNEFVIRLQPSSEAMYMKLTVKKPGLEMATEQSELDLSYGMRYQDVKIPE  
AYERLILDTIRGDQQHFVRRDELKAAWQIFTPLLHNDIAGKLVAVSYKPGSRGPKEADELSEKVGVMQTHGYIWIPTLAS

#### >SbCy (estExt\_Genewise1.C\_chr\_65912)

MSGGSSPSSRRNSFNLSRDLDPSEQGLSIVVLGASGDLAKKKTFFPALYHLFDQGFQISGEVHIFGYARSNLSDDGLRERIRGY  
LKGDPEDLSEFLQLIKYVSGSYDTGEGFQKLNKTI SQYEASNKSGSYRRLFYLALPPSVYPSVCKMIRTYCMNPSSHPGWTRVIVE  
KPFKDLDSAEELSAQLGELFEEHQLYRIDHLYLGGKELVQNLVLRANRFLPLWNRDNIDNIQIVFREDFGTGDRGGYFDQYGI  
RDI IQNHLLQVFCVAMEKPVSLKPEHIRDEKVKVQLQSVNPIKPEEVVLGQYDGYKDDPTVPDDSNTPPTFASVLRVHNERWEGVP  
FILKAGKALSSRKAERVQFKDVPDGI FRNKRQGRNEFVIRLQPSSEAMYMKLTVKKPGLEMATEQSELDLSYGMRYQNIKIPEAYE  
RLILDITIRGDQQHFVRRDELKAAWQIFTPLLHNDIDGKLVAVSYKPGSRGPKEADELSARVGYVQTHGYIWIPTLAS

#### >ZmCy (NP\_00115068)

MSGGSSPSSRRNSFNLSKDLDPSEQGLSIVVLGASGDLAKKKTFFPALYHLFEQGFIQSGEVHIFGYARSNLSDDGLRERIRGY  
LKGAPEDLSEFLQLIKYVSGSYDTGEGFEKLNRAISEYEVSKSSGSYRRLFYLALPPSVYPSVCKMIRTYCMNPSSHPGWTRVIVE  
KPFKDLDSAEELSAQLGELFEEHQLYRIDHLYLGGKELVQNLVLRANRFLPLWNRDNIDNIQIVFREDFGTGDRGGYFDQYGI  
RDI IQNHLLQVFCVAMEKPVSLKPEHIRDEKVKVQLQSVNPIKPEEVVLGQYDGYKDDPTVPDDSNTPPTFASVLRVHNERWEGVP  
FILKAGKALSSRKAERVQFKDVPDGI FRNKRQGRNEFVIRLQPSSEAMYMKLTVKKPGLEMATEQSELDLSYGMRYQNIKIPEAYE  
RLILDITIRGDQQHFVRRDELQAAWQIFTPLLHNDIDGKLVAVSYKPGSRGPKEADELSARVGYVQTHGYIWIPTLAS

#### >TaCy (BAA97663.1)

MAGTDSSASSRQSSFNLSLAKDLELPLEQGCLTIVVLGASGDLAKKKTFFPALYHLFEQGFLQSGEVHIVGYARTNLSDDGLRGRIRA  
YKLGASEEHVSEFLQLIKYVSGSYDSGEGFEKLNKEISDYEMSNNSGSSRRLFYLALPPSVYPSVCKMIRTYCMSPTSRAGWTRVI  
VEKPFGRDLDSAEELSSQLGELFEEDQLYRIDHLYLGGKELVQNLVLRANRFLPLWNRDNVDNIQIVFREDFGTGDRGGYFDQYG  
IIRDI IQNHLLQVFCVAMEKPVSLKPEHIRDEKVKVQLQSVNPIKDEEVVLGQYQGYKDDPTVPDDSNTPPTFASIVLRVHNERWEG  
VPFILKAGKALNSRKAERIRVQFKDVPDGI FKCCKQGRNEFVIRLQPSSEAMYMKLTFVQVKKPGLEMATEQSELDLSYGMRYQDVK  
IPEAYERLILDTIRGDQQHFVRRDELKAAWQIFTPLLHNDIAGKLVAVSYKPGSRGPKEADELSEKVGVMQTHGYIWIPTLAS

#### >AtCy1 (At3g27300.1)

MGSGQWHMEKRSTLKNDSFVKEYNPVETETGSLIIVLGSAGDLAKKKTFFPALFNLFHQGFLNPDEVHIFGYARSKIITDEELRDKIR  
GYLVDEKNAEQAEALSFKFLQLIKYVSGPYDAEFGFRLDKAISEHEISKNSTEGSSRRLFYLALPPSVYPSVCKMIKAWCTNKSD  
LGGWTRIVVEKPFKDLDESALSSQIGALFEFPQIYRIDHLYLGGKELVQNLVLRANRFLPLWNRDNIANVQIVFREDFGTGTEGR  
GGYFDEYGIIRDI IQNHLLQVLCVAMEKPI SLKPEHIRDEKVKVQLQSVPIKDEEVVLGQYEGYRDDPTVPNDNTPPTFATILR  
INNERWEGVPFILKAGKAMSSKKADIRIQFKDVPDGI FKCQNQGRNEFVIRLQPSSEAMYMKLTVKQPGLEMQTVQSELDLSYKQRY  
QDVISPEAYERLILDTIRGDQQHFVRRDELKAAWQIFTPLLHNDIDGKLVAVSYKPGSRGPKEADELQLLKAGYMQTHGYIWIPTLAS

#### >AtCy1.1 (At5g40760.1)

MGSGQWHVEKRSTFRNDSFVREYIVPETGCLSIIVLGSAGDLAKKKTFFPALFNLYRQGFNLNPDEVHIFGYARTKISDEELRDRIR  
GYLVDEKNAEQAEALSFKFLQLIKYVSGPYDAEFGFRLDKAISEHEISKNSTEGSSRRLFYLALPPSVYPSVCKMIKAWCTNKSD  
LGGWTRIVVEKPFKDLDESALSSQIGELFDESQIYRIDHLYLGGKELVQNLVLRANRFFLPLWNRDNIANVQIVFREDFGTGTEGR  
GYFDEYGIIRDI IQNHLLQVLCVAMEKPI SLKPEHIRDEKVKVQLQSVVPI SDDEVVLGQYEGYRDDPTVPNDNTPPTFATILR  
HNERWEGVPFILKAGKALNSRKAERIRIQFKDVPDGI FRCQKQGRNEFVIRLQPSSEAMYMKLTVKQPGLEMDMNTVQSELDLSYQRYQ  
GVAIPEAYERLILDTIKGDQQHFVRRDELKVAWEI FTPLLHRIDKGEVKSIPYKPGSRGPKEADQLEKAGYLQTHGYIWIPTLAS

#### >PtCy1 (estExt\_Genewise1\_v1.C\_LG\_XVII0625)

MGSGQWVMEKRSSFRSDSFSKEYETVPETGCLSIIVLGSAGDLAKKKTFFPALYNLYRRGFLQSNVYIFGYARTKISDDDLRNRIR  
GYFGKDAESEHSEVSKFLQLIKYVSGYDTEGFRLLDKEISEHEVSKNSAEGSSRRLFYLALPPSVYPPVCRMIRKCCMNRSDLG  
GWTRIVIEKPFKDLDESALSSQIGELFEEQYIYRIDHLYLGGKELVQNLVLRANRFFLPLWNRDNIDNVQIVFREDFGTGTEGRG  
YFDEYGIIRDI IQNHLLQVLCVAMEKPVSLKPEHIRDEKVKVQLQSVLP I KDEEVVLGQYEGYRDDPTVPNDNTPPTFATVLRIR  
NERWEGVPFILKAGKALNSRKAERIRVQFKDVPDGI FKCQKQGRNEFVIRLQPSSEAMYMKLTVKQPGLEMSTVQSELDLSYKQRYQ  
VAIPEAYERLILDTIRGDQQHFVRRDELKAAWQIFTPLLHRIDGEMKPLQYQPGSRGPVEADELLAKAGYVQTHGYIWIPTLAS

**>PtCy1.1 (grail3.0054015801)**

MGSGQWMEKRSGLENDSFLKEHETAPESGCLSIIVLGASGDLAKKKTFFPALYHLYRQGFLHPDEVHIFGYARTRISDDELDRIR  
GYLGKEAEVVSFLQLIKYVSGSYDTEGDFQLLDEKISQHEVSKNSAEGSSRRLFYFALPPSVYPTVCRMIRKCCMNKSDHGGWTR  
IVIEKPFPGKDLASAENLSAHIGELFEEAQLFRIDHLYLGGKELVQNLLVLRANRFFLPLWNRDNI SNVQIVFRENFGTEGRGGYFDE  
YGIIRDI IQNHLLQVLCVAMEKPVSLKPEYIRDEKVKVLSVLPIDDEDVVLGQYDGYRDDPTVPDQSNPTPTFATVVLRIHNERW  
EGVPPFILKAGKALNSSKAEIRVQFKDVPDGI FKCKQQRNEFVIRLQPSSEAMYMKLTVKQPGLEMSTVQSELDLSYQRYQGVPI P  
EAYERLILDTIRGDQQHFVRRDELKAWEIFTPLLRIDNGEMKPKKEYQPGSRGPVEADELLAKAGYVQTHGYIWIPTTL

**>StCy (CAA52442.1)**

MAASWCIEKRSIRNDSFRDNDNI PETGCLSIIVLGASGDLAKKKTFFPALFNLYRQGFLQSNEVHIFGYARTKISDDDLRSRIRGY  
LSQKGENEVESEFLQLIKYVSGSYDSAEGFTSLDKAISEHEFSKNSTEGSSRRLFYFALPPSVYPSVCRMIKSYCMNKSDLGGWT  
RTVVEKPFPGKDLASSEQLSSQIGELFDEPQIYRIDHLYLGGKELVQNLLVLRANRFFLPLWNRDNI DNIQIVFREDFGTEGRGGYFD  
EYGIIRDI IQNHLLQVLCVAMEKPVSKPEHIRDEKVKVLSMLPIEDEEVVLGQYEGYKDDPTVPNNSNTPTFATMVLRIHNER  
WEGVPPILKAGKALNSKAEIRVQFKDVPDGI FRCKQQRNEFVIRLQPSSEAMYMKLTVKQPGLEMSTVQSELDLSYQRYQGVVI  
PEAYERLILDTIRGDQQHFVRRDELKAWEIFTPLLRIDNGEVKPIPYKPGSRGPAEDELQAGYVQTHGYIWIPTTL

**>MtCy1 (Q42919)**

MGTNEWHVERRDSIGTESPVAREVLETGTLISIVLGASGDLAKKKTFFPALFHLKQELLPPDEVHIFGYARSKISDDELNRKLSY  
LVPEKASPKQLDDVSKFLQLVKYVSGPYDSEDGFRLLDKEISEHEYLKNSKEGSSRRLFYFALPPSVYPSVCKMIKTCCMNKSDL  
GGWTRVVEKPFGRDLESAEELSTQIGELFEEPIYRIDHLYLGGKELVQNMLVLRANRFFLPLWNNHIDNVQIVFREDFGTDGRG  
GYFDQYGIIRDI IPNHLLQVLCIAMEKPVSLKPEHIRDEKVKVLESVLPIDDEDVVLGQYEGYTDPTVPDSDNTPTFATTILRI  
HNERWEGVPPILKAGKALNSKAEIRVQFKDVPDGI FRSKKQQRNEFVIRLQPSSEAMYMKLTVKQPGLEMSAVQSELDLSYQRYQ  
GITIPEAYERLILDTIRGDQQHFVRRDELKASWQIFTPLLHKIDRGLKPVYPNPGSRGPAEDELLEKAGYVQTPGYIWIPTTL

**>MtCy2 (ACJ85742)**

MATKDCWQCVQRSSIENDSPLVDNNGPENGSLISIVLGASGDLAKKKTFFPALFNLYKQGFLLANEVCI FGYARTKISDEELNRRL  
RGYLKKEKASPEKLETVSKFLHLIKYVSGSYDSENDFRLLDKEISKHESTNTAEGSSRRLFYFALPPSVYPSVSKMIKTACMNK  
SDHGGWTRIVVEKPFPGKDLASAELSTQIGGLFEEPIYRIDHLYLGGKELVQNMLVLRANRFFLPLWNRDNIANVQIVKEDFGTD  
GRGGYFDQYGIIRDI IQNHLLQIFCLVAMEKPVSMRPEHIRDEKVKVLESVLPIDDEDVVLGQYEGYRDDPTVPDSDNTPTFASVI  
LRVHNERWEGVPPILKAGKALNSKAEIRVQFKDVPDGI FKCKQQRNEFVMRLRSEAMYMKLTVKQPGLEMSTVQSELDLSYRQ  
RYHDVTIPEAYERLILDTIRGDQQHFVRRDELKAFWEIFT  
PLLRIDKGEFKSIPYKFGSRGPKQADELLEKAGYVQTHGYIWIPTTL

**>NtCy (CAA04992)**

MAASWCIEKRSRLRDSFRENNDNI PETGCLSIIVLGASGDLAKKKTFFPALFNLYRQGFLQSNEVHIFGYARTKISDDDLRSRIRGY  
LSKGKEYEVESEFLQLIKYVSGSYDSGEGFSLDKAIAEHEFAKNSTEGSSRRLFYFALPPSVYPSVCRMINKNYCMNKSDLGGWTR  
IVVEKPFPGKDLASAELSSQIGELFNEPQIYRIDHLYLGGKELVQNMLVLRANRFFLPLWNRDNI DNIQIVFREDFGTEGRGGYFDE  
YGIIRDI IQNQLLQVLCVAMEKPVSKPEHVRDEKVKVLSMLPIKDEEVVLEQYEGYKDDPTVPGNSNTPTFATMVLRIHNERW  
EGVPPIMKAGKALNSKAEIRVQFKDVPDGI FRCKKQQRNEFVIRLQPSSEAMYMKLTVKQPGLEMSTVQSELDLSYQRYQGVPI P  
EAYERLILDTIRGDQQHFVRRDELKAWEIFTPLLRIDDDGEIKPIPYKPGSRGPAEDELQNVGYVQTHGYIWIPTTL

**>OsCy (LOC\_Os02g38840.1)**

MSGGSSPRSRSSFNLSRDLPEQGLSIVIVLGASGDLAKKKTFFPALFHLFAQGFIQSGEVHIFGYARSNLSDDGLRERIRGY  
LKGASEEHLSDFLQHIKYVSGSYDSGEGFEKLNKEISEYEKSNKSESPRRLFYFALPPSVYPSVCKMIRTYCMNPSGWTRVIVEK  
FGKDLDSSEELSAQLGELFDENQLYRIDHLYLGGKELVQNMLVLRANRFLPLWNRDNI DNIQIVFREDFGTDGRGGYFDQYGI IRD  
IIQNHLQVFLVAMEKPVSLKPEHIRDEKVKVLSVNP I KHDEVVLGQYEGYKDDPTVPDSDNTPTFASVVRVHNERWEGVPPFI  
LKAGKALSSRKAIEVRVQFKDVPDGI FKCKRQQRNEFVIRLQPSSEAMYMKLTVKQPGLEMATEQSELDLSYGMRYQNVKIP EACERL  
ILDTIRGDQQHFVRRDELKAAWQIFTPLLDHIDEGKVKSIPIYQPGSRGPKAEDELSEFVGYMQTHGYIWIPTTLA

## Plastidial P1-G6PDH

### >NtP1 (CAA04994)

MGGQLQLNPCSSTVATTFHNGAHKFCRNFNLPFKAHSLESSVASTFHNGIYSRIQPRKHFEIMSSNGFHLNAVSLDGSASKSM  
PEQVPLTELENAETTIVSITVIGASGDLAKKKIFTALFALFYEDCLPENFIVFGYSRTKMSDEELRNMI SKTLTCRIDDQRENCEAKM  
DHFLERCFYHSGQYHSEDDFAELDYKLAKEGSRVSNRLFYLSIPPNI FVDVVRASLKASSTSGWTRVIVEKPFGRDLESSSELT  
RCLKKYLTEEQIFRIDHYLKGKELVENLSVLRFSNLVFEPLWSRNYIRNVQFIFSEDFGTEGRGGYFDNYGIIRDIMQNHLQLIAL  
FAMETPVSMDAEDIRNEKVKVLRSMRPLQLEDVVLGQYKGHSGGKLYPAYTDDPTVPNGSVTPTFSAALFINNARWDGVPFLMK  
AGKALHTRRAEIRVQFRHVPGNLYKRNFGTDLDKATNELVLRVQDEAIYKINNKVPGLGMRLDRSDLNLLYKAKYRGEIPDAYE  
RLLLDAIEGERRLFI RSDDELDAAWALFTPLLKELEEKKIAPELYPYGSRGPVGAHYLAAKHNVRWGDLSGDD

### >OsP1 (LOC\_Os03g29950)

MAGTGLRFRQGAIFFSGAHAAHPRTTRPHHHCSPQRTHDARGRCRLTAKSANGRPQISASFRDVAIDGAQSEDGAPEQGGSTVSI  
TVVGASGDLAKKKIFPALFALFYEDCLPEHFTVFGYARSKMSDEELRNMI SLTLTCRIDDQRENCSDKMEQFLKRCFYQSGQYNS  
GFSELDRLKKEKEAGKVPNRLFYLSIPPNI FVDVVRASRTASSQDGTWTRFIVEKPFGRDSESSGELTRNLKYLAEQIFRIDHY  
LKGKELVENLSVLRFSNLVFEPLWSRNYIRNVQLIFSEDFGTEGRGGYFDNYGIIRDIMQNHLQLIALFAMETPVSLDAEDIRNEK  
VKVLRSMRQLRLEDVVVQYKGHSGGKTYPAYVDDPTVPSGSITPTFAAALFIDNARWDGVPFLMKAGKALHTRRAEIRVQFRR  
VPGNLYGRRSRVGGGTTATRELEKATNELVLRVQDEAIYKINNKVPGLGMRLDSDLNLLYSERYPAEIPDAYERLLLDIAIE  
GERRLFI RSDDELDAAWAIFTPVLADLEANKVAPELYPYGSRGPVGAHYLAANHNVRWGDIS

### >SbP1 (fgenes1\_pg.C\_chr\_1003339)

MAATAALSFHPAAFSVAHPREAAAAATKQPLRHCSPLRSVVPRTCLLRARSSNGRPQISASFGNSNEVLDMPTGDGPPAPGQG  
GSTVSI TVVGASGDLAKKKIFPALFALFYEDCLPEHFTVFGYARSKMSDEELRNMI STTLTCRIDDKRENCQDKMEQFLKRCFYQSG  
QYNSEEGFAELDRKKEKEAGRLPNRLFYLSIPPNI FVDVVRASRTASSSSGWTRFIVEKPFGRDSESSGELTRSLKIIDHYLKG  
KELVENLSVLRFSNLVFEPLWSRNYIRNVQFIFSEDFGTEGRGGYFDNYGIIRDIMQNHLVQI LALFAMETPVSLDAEDIRNEKVKV  
LRSMRQLKLEDVVVQYKGHSGGGRSYPGYADDPTVPKGSVPTFAAALFIDNARWDGVPFLMKAGKALHTRRAEIRVQFRVPG  
NLYRRNIGTDLDKATNELVLRVQDEAIYKINNKVPGLGMRLDRSNLNLLYSERYRREIPDAYERLLLDAMEGERRLFI RSDDEL  
AAWAIFTPVLELEDKVAPELYPYGSRGPVGAHYLAANYNVRWGDITSDDAAF

### >AtP1 (At5g35790.1)

MATHSMIIPSPSSSSSLATAASPFKETLPLFSRSLTFPRKSLFSQVRLRFFAEKHSQLDTSNGCATNFASLQDSGDQLTEEHVTK  
GESTLSITVVGASGDLAKKKIFPALFALFYEGCLPQDFSVFGYARTKLTHEELRDMISSTLTCRIDDQREKCGDKMEQFLKRCFYHS  
GQYNSEEDFAELNKKLKEKEAGKISNRLYYLSIPPNI FVDVVRASLRASSENGWTRVIVEKPFGRDSESSGELTRCLKQYLTEEQ  
IFRIDHYLKGKELVENLSVLRFSNLVFEPLWSRNYIRNVQLIFSEDFGTEGRGGYFDQYGIIRDIMQNHLQLIALFAMETPVSLDA  
EDIRSEKVKVLRSMKPLRLEDVVVQYKGHNKGGKTYPGYDDPTVPNHSLTPTFAAAMFINNARWDGVPFLMKAGKALHTRGAE  
IRVQFRHVPGNLYKKS FATNLNATNELVIRVQDEGIYLRINNKVPGLGMRLDRSDLNLLYSRYPREIPDAYERLLLDIAIEGER  
RLFIRSDDELDAAWDLFTPALKELEEKKIIPELYPYGSRGPVGAHYLASKYNVRWGDLSGAA

### >PtP1 (fgenes4\_pm.C\_LG\_XIV000487)

MATHFSPCSSSTNFLPSSCFKNETTVLFSRFAVTVPRKSTWVTQNHRSRIQGRKHFHIKSSNGHPLNAVSLQDQKAEKEESTLSI  
TVVGASGDLAKKKIFPALFALFYEDWLPENFTVFGYARTKLTDEELRNMI SGTLTCRIDDQRENCEDKMDQFLKRCFYHAGQYDSEG  
DFSELNKLKEKEAGKVS NRLFYLSIPPNI FVDVVRASLRASSLNGWTRVIVEKPFGRDSESSGELTRCLKQYLTEDQIFRIDHY  
LKGKELVENLSVLRFSNLVFEPLWSRDYIRNVQLIFSEDFGTEGRGGYFDNYGIIRDIMQNHLQLIALFAMETPVSLDAEDVRNEK  
VKVLRSMKPLQLEDVIVGQYKGHSGKGRSYPAYTDDPTVPKDSRTPTFAAALFINNARWDGVPFLMKAGKALHTRRAEVRVQFRH  
VPGNLYKRNFGTDLDKATNELVLRVQDEAIYKINNKVPGLGMRLDRSDLNLLYSARYPREIPDAYERLLLDIAIAGERRLFI RSD  
ELDAAWALFTPMLKELELKKIVPELYPHGSRGPVGAHYLAAKYNVRWGDLSDDSDS

### >StP1 (CAA58775.1)

MGVQLRLNPCSSTSAATSPSTFHNGTYPYFCKKNFLPFTQPLNWNVSGIYSRIQPRKHFEVFSNGFPLNAVSVQDVQVPLTELGS  
GDTTIVSITVIGASGDLAKKKILPALFALFYEDCLPENFVVFYGSRTKLSDEELRNMI STTLTCRIDDKRENCDAKMEHFLERCIFYHS  
GQYNSEDDFAELDYKLAKEGCRVSNRLFYLSIPPNI FVDVVRASLKASSTSGWTRVIVEKPFGRDLESSSELTRSLKYLTEEQ  
IFRIDHYLKGKELVENLSVLRFSNLVFEPLWSRNYIRNVQFIFSEDFGTEGRGGYFDHYGIIRDIMQNHLQLIALFAMETPVSLDA  
EDIRNEKVKVLRSMRPLQLEDVVLGQYKGHSGAKSYPAYTDDPTVPNGSITPTFSAALFIDNARWDGVPFLMKAGKALHTKRAE  
IRVQFRHVPGNLYKRNFGTDMDKATNELVLRVQDEAIYKINNKVPGLGMRLDRSDLNLLYKAKYRGEIPDAYERLLLDIAIEGER  
RLFIRSDDELDAAWALFTPLLKELEEKKIAPELYPYGSRGPVGAHYLAAKHNVRWGDLSGDD

## Plastidial P2-G6PDH

### >HvP2 (CAL44728)

MALSCMRCPSVAAGPAVRRPSSVALSLARCGRPAAVASGGWRIHAVAGKGVVKGPMDTAVENTVAPAAPSPVENGTSSAITVEE  
YEDLASLAKDDEASVSI TVVGASGDLAKKKI F PALFALY YEGCLPKHFTIFGYARSKMTDAELRHMVSKTLTCRDKRENCSEKME  
EFLKRCFYHSGQYDSEEDFRELGKKIELHQGPRVSNHLFYLSIPPNI FLDVVKCASKSASSASGWTRVIVEKPFGRDSESSAALTR  
GLKEFLAEDQIFRI **DHYLGKE**LVENLSVLRFSNLVFEPLWSRQYIRNVQLIFSEDFGTEGRGGYFDSYGIIRDIMQNHLQLLALF  
AMETPISLEAEDIRNEKVKVLRSMKPLRLEDVVIGQYKSHTKGGITYPGYTEDKTVPKGSLTPTFAAAALFINNARWDGVPFLMKA  
GKALHTKQAEIRVQFRHVPGNLYKGSFGTDLDRATNELVIRVQPDGGIYKINNKIPGLGMRLDRSNLNLHYAARYKEIPDAYER  
LLDAIEGERRLFI RSDELDAAWELFTPLLKELEQKRMAPELYPYGSRGPVGAHYLAAKYNVRWGD LGGSEH

### >NtP2 (AAF87216.1)

MVTLYSSPSTHSSGAVASYSNSSIGLYNYHNNKQIAVSSILSRKFGSLQINQKPFWNVAVRMQDGA VATPPSKIENETPLKKLKNGI  
LPVAPPKQKDTIDFDSNKA KSTVSI TVVGASGDLAKKKI F PALFALY YEGCLPEHFTIFGYARSKMTDAELRNMVSKTLTCRDK  
RENCGEKMEQFLERCFYHSGQYDSEENFAELDKLKEHEAGRFSNRLFYLSIPPNI FINAVRCASLSASSAHGWTRVIVEKPFGRD  
SESSAALTRSLKQYLNEDQIFRI **DHYLGKE**LVENLSVLRFSNLIFEPLWSRQYIRNVQIFSEDFGTEGRGGYFDHYGIIRDIMQN  
HLLQILALFAMETPVSLDAEDIRNEKVKVLRSMRPLQLDDVIGQYKSHTKGDVTPYGYTDDKTVPKDSLTPTFAAAALFINNARW  
DGVPFLMKAGKALHTRS A EIRVQFRHVPGNLYKNKFGSDLDQATNELVIRVQ PNEAIYKINNKV PGLGMRLDRSNLNL LYSARYS  
KEIPDPYERLLLDAIEGERRLFI RSDELDAAWSLFTPVLKELEDKKI VPEYYPYGSRGPIGAHYLAARYKVRWGD LV

### >OsP2 (LOC\_Os07g22350)

MALSCMRCSPAAGAVRRGLASAAPPAALS FARCGLRRAAALGWRVA AVATTGVQAKDAGLEKAARSASQSKVENGS PSEI I LDDF  
EDLSPLSENDDSTVSI TVVGASGDLAKKKI F PALFALY YEDCLPKHFTIFGYARSKMTDAELRNMVSKTLTCRDKRENCNEKMEE  
FLKRCFYHSGQYDSEEHFMDLKKLQHEGSRVSNRLFYLSIPPNI FLDVVKCASKSASSSGNWTRVIVEKPFGRDSDSSALTRG  
LKQYLVEDQIFRI **DHYLGKE**LVENLSVLRFSNLVFEPLWSRQYIRNVQLIFSEDFGTEGRGGYFDYGIIRDIMQNHLQLLALFA  
METPVSLAEDIRNEKVKVLRSMKPLQLEDVVIGQYKSHTKGGTTYPGYTEDKTVPKDSVTPPTFAAAALFINNARWDGVPFLMKAG  
KALHTKQAEIRVQFRHVPGNLYKRSFGTDLDTATNELVIRVQ PDEAIYKINNKIPGLGMRLDRSNLNLHYAARYSKEIPDAYERL  
LLDAIEGERRLFI RSDELDAAWELFTPLLKELEEKRIAPELYPYGSRGPVGAHYLAAKYNVRWGD LTT EQKA

### >SbP2 (estExt\_Genewise1Plus.C\_chr\_60876)

MALSCMRCPAGATGSARRAPFATAAAVSVFARCGGLGRSASAAAAACWRIHAVAPQGA KAPMTADV KHVVT PPA SPKVENGSPSEI  
TLDEFEDLSALCKNGNDSTVSI TVVGASGDLAKKKI F PALFALY YEDCLPKHFTIFGYARSKMTDAELRNMVSKTLTCRDKREN  
CSEKMEFLKRCFYHSGQYDSEEHFLDLKKLQHEGPRVSNRLFYLSIPPNI FLDVVKCASKSASSVNGWTRVIVEKPFGRDSES  
SAALTRGLKQYLVEDQIFRI **DHYLGKE**LVENLSVLRFSNLVFEPLWSRQYIRNVQLIFSEDFGTEGRGGYFDYGIIRDIMQNHL  
QILALFAMETPISLEAEDIRNEKVKVLRSMKPLQLEDVVIGQYKSHTKGGTTYPGYTDKTVPKDSVTPPTFAAAALFINNARWDG  
VPFLMKAGKALHTKRAEIRVQFRHVPGNLYKGSFGTDLDRATNELVIRVQ PDEAIYKINNKIPGLGMRLDRSNLNLHYAARYSKEI  
PDAYERLLLDAIEGERRLFI RSDELDAAWSLFTPLLKELEEKRIAPELYPYGSRGPVGAHYLAAKYNVRWGDLSAEHYKA

### >AtP2 (At5g13110.1)

MAALSSSVTTRSYHSGYLASFSPVNGDRHRSLSFSLAS PQGLNPLDL CVRFQRKSGRASVFMQDGAIVTNSNSSES KTS LKGLKDE  
VLSALSQBAAKVGVESDGQSSTVSI TVVGASGDLAKKKI F PALFALY YEGCLPEHFTIFGYARSKMTDVELRNMVSKTLTCRDK  
RANCGEKMEFLKRCFYHSGQYDSEEHFTELDKLKEHEAGRI SNRLFYLSIPPNI FVDVAVKCASTSASSVNGWTRVIVEKPFGRD  
SETSAALTKSLKQYLEEDQIFRI **DHYLGKE**LVENLSVLRFSNLIFEPLWSRQYIRNVQIFSEDFGTEGRGGYFDNYGIIRDIMQN  
HLLQILALFAMETPVSLDAEDIRNEKVKVLRSMRPIRVEDVVIGQYKSHTKGGVTPYATDDKTVPKGSLTPTFAAAALFINNARW  
DGVPFLMKAGKALHTRS A EIRVQFRHVPGNLYNRNTGSDLDQATNELVIRVQ PDEAIYKINNKV PGLGMRLDRSNLNL LYSARYS  
KEIPDAYERLLLDAIEGERRLFI RSDELDAAWSLFTPLLKEIEEKRIPEYYPYGSRGPVGAHYLAAKHKVQWGDVSDQ

### >AtP2.1 (At1g24280.1)

MSSLSCPTYRSRTSSSPFLSNHHSSLINVVDPRRSLSFHYAS PQGLNLAELCVVRSQRSSVQSSVVVQDGSVATESSSSEAKD  
VGVLTIPSLADKVVVAESDGGQLSTVSI TVVGASGDLAKKKI F PALFALY YEGCLPEHFTIFGYARSKMTDAELRNMVSKTLTCR  
IDKRANCGEKMEFLKRCFYHSGQYDSEEHFVALDEKLKEHEGGRLSNRLFYLSIPPNI FVDVAVKCASTSASSVNGWTRVIVEKPF  
GRDSKTSAAALTKSLKQYLEEDQIFRI **DHYLGKE**LVENLSVLRFSNLIFEPLWSRQYIRNVQIFSEDFGTEGRGGYFDNYGIIRD  
MQNHLL  
QILALFAMETPVSLDAEDIRNEKVKVLRSMRPIKLEDVVIGQYKSHS IGGVTPSYTDDKTVPKGSLTPTFAAAALFINNARWDG  
VPFLMKAGKALNTRS A EIRVQFRHVPGNLYNRNSGTDRTQTTNELVIRVQ PDEAIYKINNKV PGLGMRLDQSNLNL LYSARYSKEI  
PDAYERLLLDAIEGERRLFI RSDELDAAWALFTPLLKEIEEKKTTEPEYYPYGSRGPVGAHYLAAKHKVQWGDLSLDQ

### >PtP2 (estExt\_Genewise1\_v1.C\_LG\_I7789)

MATLYSTTCRSISYSLTPSSSSSSSLINGQNHQRNLFSSCIAKRVLPVKVFSHRRNFHLNVVLMQDGA VATPVTPVENETPFK  
KLDGFLSSVPTSEEIKEAASFDVNKDESTVSI TVVGASGDLAKKKI F PALFALY YEGCLPEHFTIFGYARSKMTDAELRNMVSKT  
LTCRDKRENCDEKMDQFLKRCFYHSGQYGSQENFAELDKLKEHEGARVSNRLFYLSIPPNI FIEAVKCASTSASSSGIGWTRVIV  
EKPFGRDSDSSAALTKALKQYLEDQIFRI **DHYLGKE**LVENLSVLRFSNLIFEPLWSRQYIRNVQLIFSEDFGTEGRGGYFDNYGI  
IRDIMQNHLQLLALFAMETPVSLDAEDIRNEKVKVLRSMRPLQLEDVVIGQYKNHTKGGVTPYATDDNTVPKGS LTPTFAAAAL  
FINNARWDGVPFLMKAGKALHNKSAEIRVQFRHVPGNLYNRNFGTDLDRATNELVIRVQ PDEAIYKINNKV PGLGMRLDRSNLHL  
HYAARYSKEIPDAYERLLLDAIEGERRLFI RSDELDAAWALFTPVLKELEEKKI IPEYYPYGSRGPVGAHYLAARYKVRWGD LGIE  
Q

### >PtP2.1 (eugene3.00031378)

MAALYSTTCRSHSYSLTPSSSSSSSFHQNHQRNLFSSYIAKRVLPKVSFHSRRNYHLNVVLMQDGA VATPATLVENETPFKLLK  
GGLSSVSTQEFKEAASFDVNKDESTVSI TVVGASGDLAKKKI F PALFALY YEGCLPKHFTIFGYARSKMTDAELRNMVSKTLTC

RIDKRENCGEKMDQFLKRCFYHSGQYDSLENFAELDKKLEHEGGRVSNRLFYLSIPPNI FIDAVKCTSSSASSSIGWTRVIVEKP  
FGRDSDSSAALTKALKQYLEEDQIFRI **DHYLGKE**LVENLSVLRFSNLIFEPLWSRRYIRNVQLIFSEDFGTEGRGGYFDNYGIIRD  
IMQNHLLQILALFAMETPVSLDAEDIRNEKVKVLRSMRPLQLEDVVVGQYNSHTKGGVTYPAYIDDSTVPKGSLTPTFAAAALFID  
NARWDGVPFLMKAGKALHKKRAEIRVQFRHVPGLSYNQDFGNDLDELATNELVIRVQPEAIDLKINNKVPGLGMRLDRSNLNLLYA  
ARYSKEIPDAYERLLLDAIEGERRLFIRSELDAAWALFTPVLKELEEKNIPEYYPYGSRGPVGAHYLAARYNVRWGDLSIEQ

**>Stp2 (CAB52708.1)**

MVTLYSSPSTNCSGAFSSYSNSSIGFYNYHYNFPISRRKFGSHKISLQINAVRMQDGAVVAQPSKTQDETPLKLLKDGILSKEQKH  
TFDFDCNKDKSTVSIITVVGASGLAKKKIFPALFALYEGCLPEHFTIFGYARSKMSDDELNRNMVSKTLTCRIDKRENCGEKMEQF  
LERCFYHSGQYDSQEHFAELDKKLEHEAGRFSNRLFYLSIPPNI FINAVRCASLSASSAHGWTRVIVEKPFGRDSESSAALTGAL  
KQYLKEDQIFRI **DHYLGKE**LVENLSVLRFFNLI FEPLWSRQYIRNVQFIFSEDFGTEGRGGYFDHYGIIRDIMQNHLLQILALFAM  
ETPVSLDAEDIRNEKVKVLRSMRPLQLDDVIVGQYKSHTKGGVNYPGYTDKTVPKDSLTPFAAAALFIDNARWDGVPFLMKAGK  
ALHTRSAREIRVQFRHVPGNLYKNFGSDLDQATNELVIRVQPEAIIYKINNKVPGLGMRLDRSNLNLLYSARYAKEIPDAYERLL  
LDAIEGERRLFIRSELDAAWSLFTPVLKELEHKKIVPESYPYGSRGPVGAHYLAARYKVRWGDLA

**>ZmP2 (ACG29334)**

MALSCMRCPAGAGAASARRAAAQPLAAEAAVSFARCRGFRSATAATSAAWFRNHAVASQGVKAPMDADVKNVIPPPTSPKVESGS  
PSEITLDEFEDLSALCKNDDSTVSIITVVGASGLAKKKIFPALFALYEDCLPKHFTIFGYARSKMTDAELNRNMVSKTLTCRIDKR  
ENCSEKMEEFKRCFYHSGQYDSEEHFIDLKLLKQHEGSRVSNRLFYLSIPPNI FLDVVKCASKSASSVNGWTRVIVEKPFGRDS  
ESSAALTSGLKQYLVEDQIFRI **DHYLGKE**LVENLSVLRFSNLVFEPLWSRQYIRNVQLIFSEDFGTEGRGGYFDGYGIIRDIMQNH  
LIQILALFAMETPISLEAEDIRNEKVKVLRSMKPLQLEDVVVGQYKSHTKGGTTPGYTDKTVPKDSVTPFAAAALFINNARWD  
GVPFLMKAGKALHTKRAEIRVQFRHVPGNLYKGSFGTDLDRATNELVIRVQPEAIIYKINNKIPGLGMRLDRSNLNLHYAARYSK  
EIPDAYERLLLDAIEGERRLFIRSELDAAWSLFTPVLKELEEKRIAPELYPYGSRGPVGAHYLAARYNVRWGDLSAEHYKA

## Legends to Supplementary Figures

**Figure S1:** Relative growth rate of barley seedlings upon 0.1 mM ABA. Barley seedlings were grown for 3 days in hydroculture without any nitrogen source, then grown under 5 mM ammonium phosphate for 7 days; then seedlings were supplied with 0.1 mM of ABA and representative samples collected at given times. Appearance of control plants is shown above in comparison with ABA treated plants (below).

**Figure S2:** Western blots of P1- and Cy-G6PDH isoforms from crude extracts of roots (A) and leaves (B) of barley plants subjected to an ABA treatment. The seedlings were grown on a medium supplied with 0.1 mM of ABA and samples collected at given times. Detection of Cy- and P1-G6PDH isoforms was made using antibodies raised against potato proteins (Wendt *et al.*, 2000).

**Figure S3:** G6PDH transcript expression profiles after ABA treatment. Semi-quantitative RT-PCR were performed with RNA extracted from roots (A) and leaves (B) of samples collected at given times from seedlings supplied with 0.1 mM of ABA.

The graphs show the quantification of transcript obtained using Image J software (NIH – USA) indicated by bars. Data shown are average  $\pm$  standard error of five different determinations. A statistical one- way ANOVA analysis was performed using Jandel SigmaPlot 11.0 Software; other details in the text.

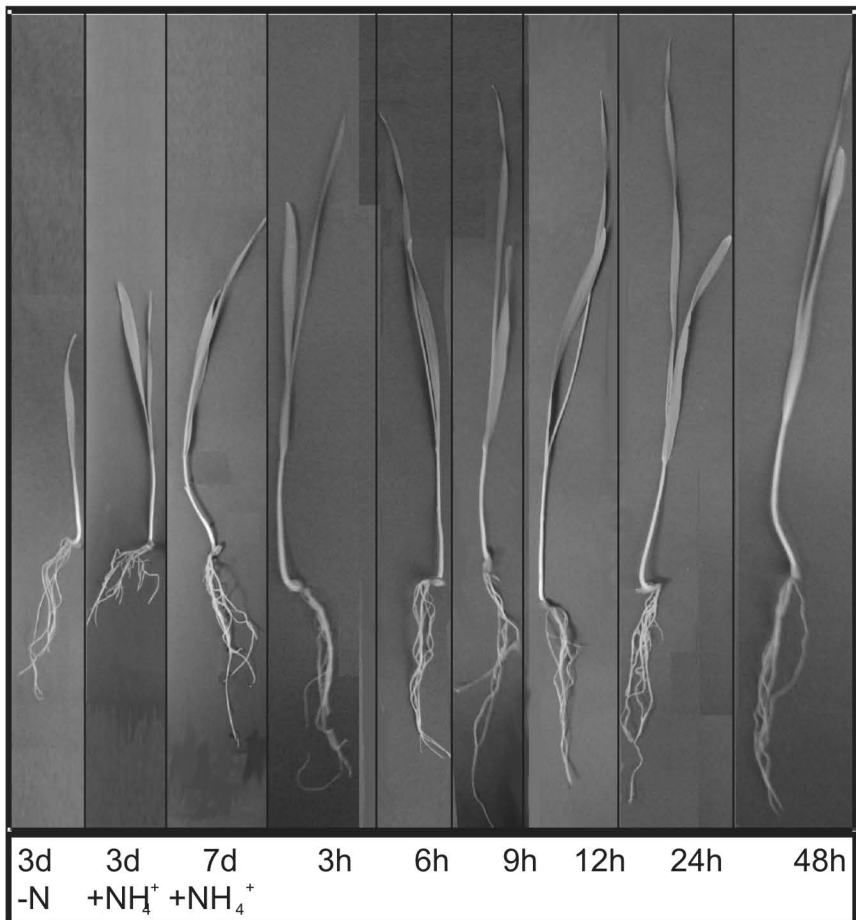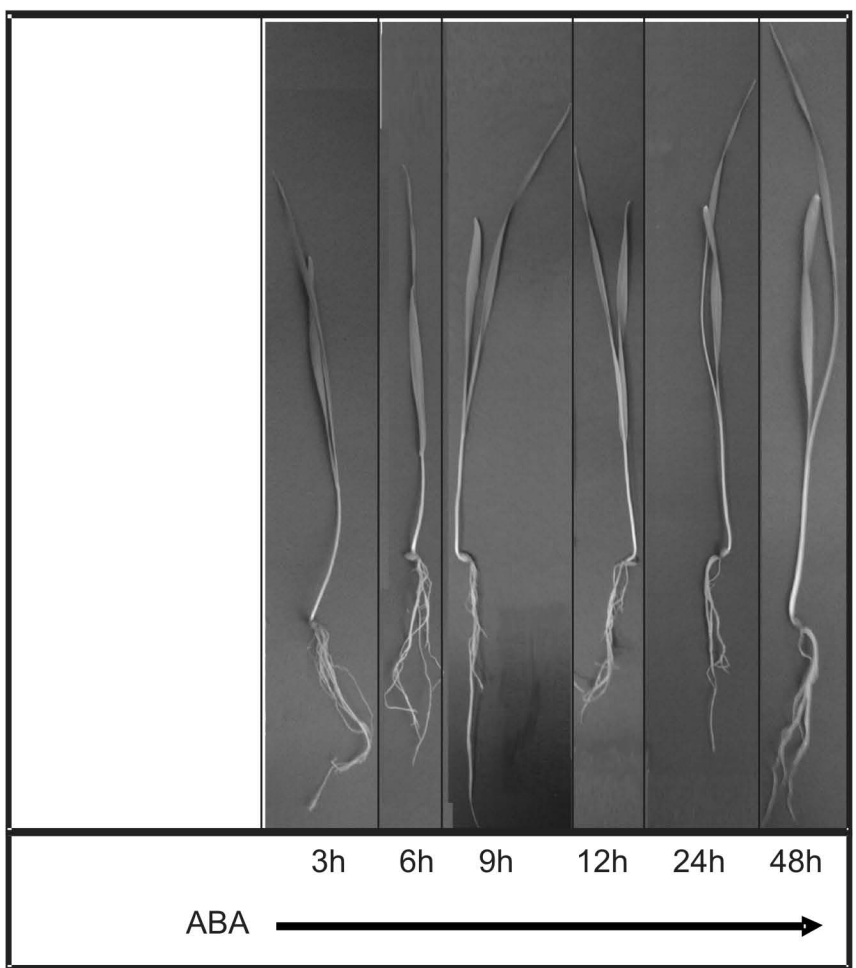

# A - ROOTS

ABA   
0 3h 6h 9h 12h 24h 48h

**Cyt**

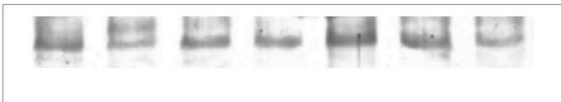

# B - LEAVES

ABA   
0 3h 6h 9h 12h 24h 48h

**Cyt**

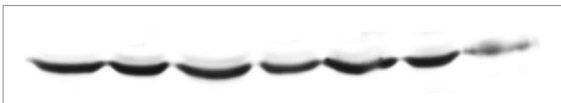

**P1**

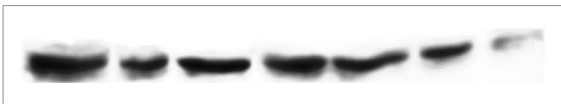



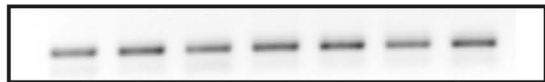

**A - Roots - Cy transcript**

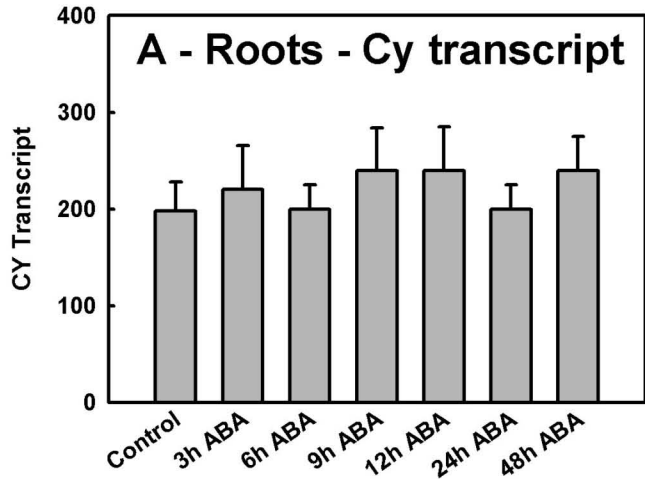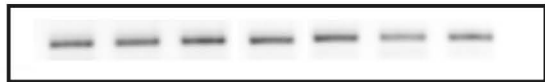

**B - Leaves - Cy transcript**

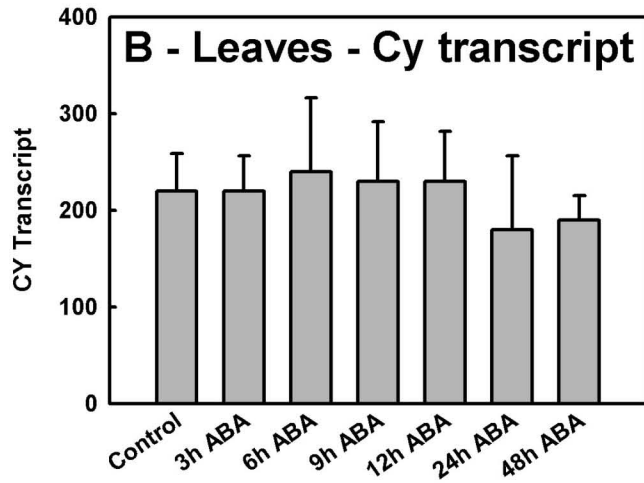

Supplement: supp_err100_00053637-file001.pdf [file supp_err100_00053637-file001.pdf]
